# Supplementary material
Source: HighWire-hosted journal article supplement (http://www.jneurosci.org/highwire/filestream/599520/field_highwire_adjunct_files/3/Supplemental_Legend.pdf)
Supplement: Supplemental_Legend.pdf [file Supplemental_Legend.pdf]

**Supplementary Figure 1A,B. Nucleotide sequences of zebrafish *cralbp a* and *b*.**

Conserved residues are boxed; dashes indicate gaps introduced to optimize the sequence alignment.

**Supplementary Figure 2. Sequence alignment of CRALBP proteins from different**

**species.** Predicted amino acid sequences of CRALBP from *Drosophila melanogaster* (*Drosophila m.*), zebrafish (*Danio rerio*), mouse (*Mus musculus*) and human are shown.

Conserved residues are boxed; dashes indicate gaps introduced to optimize the sequence alignment.

**Supplementary Figure 3. Phylogenetic tree based on the protein sequence alignment in**

**Supplementary Figure 2, using ClustalW (MegAlign, DNASTar).**
